1                   **Optimizing oleaginous yeast cell factories for flavonoids and**  
2                   **hydroxylated flavonoids biosynthesis**

3  
4                   Yongkun Lv <sup>1,2,4</sup>, Mattheos Koffas<sup>3</sup>, Jingwen Zhou <sup>2,4\*</sup> and Peng Xu <sup>1\*</sup>

5  
6                   <sup>1</sup>Department of Chemical, Biochemical and Environmental Engineering, University of Maryland Baltimore  
7                   County, Baltimore, MD 21250

8                   <sup>2</sup>National Engineering Laboratory for Cereal Fermentation Technology, Jiangnan University, 1800 Lihu Road,  
9                   Wuxi, Jiangsu 214122, China.

10                  <sup>3</sup>Department of Chemical and Biological Engineering, Rensselaer Polytechnic Institute, Troy, NY 12180

11                  <sup>4</sup> Jiangsu Provisional Research Center for Bioactive Product Processing Technology, Jiangnan University, 1800 Lihu  
12                  Road, Wuxi, Jiangsu 214122, China.

13  
14  

---

\* Corresponding author Tel: +1(410)-455-2474; fax: +1(410)-455-1049.

E-mail address: pengxu@umbc.edu (Peng Xu); zhoujw1982@jiangnan.edu.cn (Jingwen

Zhou)

## 15      **Abstract**

16      Plants possess myriads of secondary metabolites with a broad spectrum of  
17 health-promoting benefits. Up to date, plant extraction is still the primary route to produce  
18 high-value natural products, which inherently suffers from economics and scalability issues.  
19 Heterologous production in microbial host is considered as a feasible approach to overcoming  
20 these limitations. Flavonoid and its hydroxylated derivatives represent a diversified family of  
21 bioactive compounds, most prominently known as antioxidant and anti-aging agents. Oleaginous  
22 yeast is rich in hydrophobic lipid bodies and spatially-organized organelles, which provides the  
23 ideal environment for the regioselectivity and stereoselectivity of many plant-specific enzymes.  
24 In this report, we validated that *Y. lipolytica* is a superior platform for heterologous production  
25 of high-value flavonoids and hydroxylated flavonoids. By modular construction and  
26 characterization, we determined the rate-limiting steps for efficient flavonoids biosynthesis in *Y.*  
27 *lipolytica*. We evaluated various precursor pathways and unleashed the metabolic potential of *Y.*  
28 *lipolytica* to produce flavonoids, including the supply of acetyl-CoA, malonyl-CoA and  
29 chorismate. Coupled with the optimized chalcone synthase module and the hydroxylation  
30 module, our engineered strain produced 252.4 mg/L naringenin, 134.2 mg/L eriodictyol and  
31 110.5 mg/L taxifolin from glucose. Collectively, these findings demonstrate our ability to  
32 harness oleaginous yeast as microbial workhorse to expand nature's biosynthetic potential,  
33 enabling us to bridge the gap between drug discovery and natural product manufacturing.

34      **Keywords:** Natural products, Flavonoids, Hydroxylation, Metabolic engineering,  
35 Oleaginous yeast

36

37      **Running title:** Engineer oleaginous yeast factory for flavonoids

## 38      **Introduction**

39      Plant possess myriads of secondary metabolites with a broad spectrum of health-promoting  
40 benefits. Plant-derived natural products (PNPs) have been used to suppress tumor growth,  
41 inhibit retrovirus replication, treat metabolic disease and modulate cholesterol level in both  
42 animal and human tests <sup>1</sup>. Up to date, plant extraction is still the primary route to produce PNPs  
43 <sup>1</sup>. However, isolation of PNPs from their native sources is limited by low abundance and  
44 environmental, seasonal, and regional variations. Total chemical synthesis of complex PNPs  
45 often involves toxic catalyst and is commercially unsustainable due to low yield, safety concerns  
46 and strict GMP regulations <sup>2</sup>. Genome-mining of plant metabolic pathways <sup>3-8</sup> and reconstruction  
47 of biosynthetic gene clusters (BGCs) in industrially-relevant microbes offer significant promise  
48 for discovery and scalable synthesis of plant natural products.

49      *E. coli* and *S. cerevisiae* have long been established as host strains to manufacture a large

50 variety of plant natural products <sup>3, 7-14</sup>. The recent development of oleaginous yeast platforms  
51 offers significant advantages over *E. coli* and *S. cerevisiae* (Table 1). The high precursor  
52 acetyl-CoA and malonyl-CoA flux along with the hydrophobic lipid bodies make oleaginous  
53 yeast a promising host to produce various natural products with complex structures. For example,  
54 *Y. lipolytica* is known to internalize substantial portion of carbon feedstock as lipids and fatty  
55 acids <sup>15, 16</sup>, which provides the ideal amphiphilic environment for the catalytic function of many  
56 plant-derived enzymes. It has been recognized as a ‘generally regarded as safe’ (GRAS)  
57 organism for the production of organic acids, polyunsaturated fatty acids (PUFAs) <sup>17, 18</sup> and  
58 carotenoids <sup>19-22</sup> in the food and nutraceutical industry. Compared to *S. cerevisiae*, *Y. lipolytica*  
59 lacks Crabtree effects, which doesn’t require the co-feeding of ethanol for cell to grow. The low  
60 pH tolerance <sup>23</sup>, strictly aerobic nature <sup>24, 25</sup> and versatile substrate-degradation profile <sup>25-27</sup>  
61 enable its robust growth from a wide range of renewable feedstocks. Genetic toolbox  
62 development has been expanding to protein expression <sup>28-30</sup>, promoter characterization <sup>31-33</sup>,  
63 YaliBrick-based cloning <sup>34, 35</sup>, Golden gate cloning <sup>21, 36</sup>, Piggyback transposon <sup>37</sup>,  
64 genome-editing <sup>34, 38, 39</sup> and iterative gene integration <sup>40</sup>, affording us a collection of facile  
65 genetic tools for streamlined and accelerated pathway engineering in oleaginous yeast species.

66 Flavonoids represent a diversified family of phenylpropanoid-derived plant secondary  
67 metabolites, with an estimated 10,000 unique structures <sup>41, 42</sup>. They are widely found in fruits,  
68 vegetables and medicinal herbs and plants. Pharmaceutical studies and animal tests have  
69 demonstrated their anti-obesity, anti-cancer, anti-inflammatory, and anti-diabetic activities <sup>43, 44</sup>.  
70 Flavonoids are among the phytochemicals with proven activity towards the prevention of  
71 aging-related diseases, including the treatment of nervous and cardiovascular diseases,  
72 Parkinson’s and Alzheimer’s disease etc. <sup>45</sup>. These health-promoting benefits make flavonoids a  
73 distinct family of molecules to fight aging in personal care, nutraceutical industry and clinical  
74 trials. Considering the worldwide population with age older than 65 will triple in next 30 years  
75 (data from WHO, world health organization), there will be increasing interests and sustainable  
76 market demand globally in the near future.

77 To prepare the technological ground and enable microbial synthesis, various flavonoid  
78 pathways have been reconstituted in various microbial species including *E. coli* and *S. cerevisiae*  
79 recently, and the recombinant production of an array of molecules such as naringenin <sup>46, 47</sup>,  
80 eriodyctiol <sup>48, 49</sup>, resveratrol <sup>50-54</sup>, pinocembrin <sup>49, 55</sup>, anthocyanins <sup>56-58</sup>, quercetin, kaempferol <sup>59</sup>,  
81 silybin, isosilybin <sup>60</sup>, baicalein and scutellarein <sup>61</sup> has been described. Most of the reported  
82 studies were centered around simple flavanones or chalcones through enzymatic cascade  
83 reactions with the feeding of expensive phenyl precursors (phenylalanine, tyrosine, *p*-coumaric  
84 acid and caffeic acid etc), which limits our opportunity for scalable and low-cost production.  
85 Structural activity relationship (SAR) studies demonstrate the side chain modifications are  
86 highly correlated with flavonoid biological activities <sup>42, 62</sup>. The hydroxylation of flavonoids  
87 improves their metabolic stability and membrane permeability, and enhances the solubility and  
88 antioxidant property <sup>63</sup>. To date, there remains a significant challenge to produce highly

89 hydroxylated flavonoids, due to our limited ability to functionally express plant P450  
90 hydroxylases and the cytochrome P450 reductases<sup>64</sup>. Oleaginous yeast is rich in membrane  
91 structure and subcellular compartments (i.e. lipid bodies, peroxisome, ER and oleosome), which  
92 provides the hydrophobic environment that is critical for regioselectivity and stereoselectivity in  
93 hydroxylation, glycosylation and prenylation of flavonoids<sup>65-68</sup>. Developing a P450 expression  
94 platform in oleaginous yeast will enable us to access the vast majority of complex natural  
95 products and deliver robust microbial cell factories to meet the market demand.

96 To bridge this gap, we tested and assessed various plant-derived polyketide synthases, P450  
97 monooxygenase/hydroxylases and cytochrome P450 reductases in *Y. lipolytica*, to diversify the  
98 structure of flavonoids. With naringenin, eriodictiol and taxifolin as testing molecules, we  
99 characterized the catalytic efficiency of various plant enzymes, including tyrosine ammonia  
100 lyase (TAL), 4-coumaroyl-CoA ligase (4CL), chalcone synthase (CHS), chalcone isomerase  
101 (CHI), flavonone-3'-hydroxylase (F3'H), flavonol-3-hydroxylase (F3H) and cytochrome P450  
102 reductases. These plant-derived genes were coexpressed with the endogenous acetyl-CoA  
103 carboxylase (ACC1) and the pentafunctional AROM polypeptide (ARO1). Systematic pathway  
104 debottlenecking indicates that chalcone synthase, ACC1 and cytochrome P450 reductases are the  
105 rate-limiting steps for hydroxylated flavonoid production. Specifically, increasing PhCHS copy  
106 number and controlling culture pH elevated naringenin production up to 252.4 mg/L. Screening  
107 four cytochrome P450 reductases led us to identify that CrCPR derived from *Catharanthus*  
108 *roseus* is the most efficient electron shuttle to complete the hydroxylation reaction, despite that  
109 endogenous yICPR1 (YALI0D04422g) displays similar function with relatively low efficiency.  
110 Further expression of the plant-derived P450 enzymes, including the flavanol-3' hydroxylase  
111 (GhF3'H) from *Gerbera hybrid* led the engineered strain to produce about 110.5 mg/L of  
112 taxifolin and 134.2 mg/L of eriodictiol. This work set the foundation for us to engineer  
113 oleaginous yeast as chassis for cost-efficient production of flavonoids and hydroxylated  
114 flavonoids. The functional expression of plant-derived polyketide synthase, P450  
115 monooxygenase and reductases will expand our capability to access nature's biosynthetic  
116 potential for drug discovery and natural product manufacturing.

## 117 **Results and discussion**

### 118 **Modular construction and characterization of flavonoid pathway in *Y. lipolytica***

119 The availability of intracellular malonyl-CoA was reported to be a rate-limiting step of  
120 flavonoid synthesis in many microorganisms<sup>69-71</sup>. Considering the high acetyl-CoA and  
121 malonyl-CoA flux, we firstly reconstructed the synthetic pathway and validated the feasibility of  
122 using *Y. lipolytica* as the chassis to produce flavonoids. In addition, the cytochrome *c* P450  
123 (CYP) flavonoid 3'-hydroxylase (F3'H) plays a critical role in oxidizing the phenyl ring and  
124 generating hydroxylated flavonoids<sup>72</sup>. Based on the distribution of potential rate-limiting steps,  
125 we rationalized and partitioned the flavonoids pathway into two modules, the naringenin

126 synthesis module (Module I) and the hydroxylation module (Module II) (Fig. 1). Module I  
127 contains essential precursor pathway to provide shikimic acid, malonyl-CoA and chalcone  
128 precursors; while Module II contains the cytochrome *c* P450 (CYP) flavonoid 3'-hydroxylase  
129 (F3'H) and cytochrome *c* P450 reductase (CPR). As a direct assessment of the module efficiency,  
130 we have established HPLC method to analyze naringenin, eriodictiol and taxifolin (Fig. 2).

131 Naringenin is the starting point for many flavonoid functionalization chemistry. We first  
132 constructed Module I in *Y. lipolytica* Po1f to synthesize chalcone and naringenin. Because genes  
133 from different plants have different specificity and activity, we selected two genes for each of  
134 the first three steps in Module I based on the sequence alignment of closely-related plant species.  
135 Pathways containing 4CL (*p*-coumaric acid-CoA ligase), CHS (chalcone synthase) and CHI  
136 (chalcone isomerase) were assembled in monocistronic forms by YaliBricks cloning platform<sup>34</sup>.  
137 We observed that all eight constructs containing 4CL, CHS and CHI resulted in the synthesis of  
138 naringenin from *p*-coumaric acid, with production ranging from 10 mg/L to 21.5 mg/L (Fig. 3a).  
139 Interestingly, the three top producers (Fig. 3a) share the same source of chalcone synthase from  
140 *Petunia x hybrid*, indicating that chalcone synthase dictates the efficiency of Module I. To  
141 achieve *de novo* synthesis of naringenin, we further introduced tyrosine ammonia-lyase (RtTAL)  
142 from *Rhodotorula toruloides*, which has been reported to generate phenylpropanoid precursors  
143 from glucose<sup>47, 73</sup>. With the overexpression of RtTAL, we detected *p*-coumaric acid as the direct  
144 de-amination product of tyrosine (Supplementary Fig. S1). By complementing the  
145 4CL-CHS-CHI pathway, the resulted strain *Y. lipolytica* Po1f/T4SI produced 14.9 mg/L  
146 naringenin from glucose (Supplementary Fig. S1). These results validated the feasibility of using  
147 *Y. lipolytica* as chassis for *de novo* synthesis of naringenin.

148 There has been a number of reports that *Y. lipolytica* could selectively hydroxylate limonene  
149 to perillyl alcohol, perillaldehyde and perillic acids<sup>74, 75</sup>, demonstrating the endogenous P450  
150 monooxygenase and cytochrome P450 reductase is active enough to hydroxylate methyl group  
151 on monoterpenes. Our lab has demonstrated the functional expression of the P450  
152 monooxygenase that selectively hydroxylates protodeoxyviolaceinic acid to protoviolaceinic  
153 acid, generating the greenish pigment in *Y. lipolytica*<sup>76</sup>. On the basis of these results, we argue  
154 that *Y. lipolytic* could be an excellent platform for expression of plant P450 enzymes.

155 F3'H is the critical enzyme involved in the functional hydroxylation of flavonoids.  
156 Cytochrome *c* P450 reductase (CPR) is required for electron transfer from NADPH to CYP<sup>77</sup>.  
157 We have chosen two plant-derived F3'Hs and three CPRs to evaluate which F3'H-CPR pairs  
158 could perform hydroxylation chemistry (Fig. 3b). All 6 combinations of F3'H-CPR pairs  
159 produced eriodictiol. We observed that strain Po1f/HR with overexpression of CrCPR (derived  
160 from *Catharanthus roseus*)<sup>78</sup> coupled with GhF3'H (derived from *Gerbera hybrid*) or GmF3'H  
161 (derived from *Glycine max*), led to the highest eriodictiol production around 39 mg/L, with  
162 molar conversion yield up to 73.7% from naringenin (Fig. 3b). Interestingly, the two  
163 yeast-sourced CPRs, YICPR from *Y. lipolytica* and ScCPR from *S. cerevisiae* S288c, also gave

164 rise to eriodictyol, indicating the endogenous CPR is sufficient to shuttle electrons from  
165 NADPH to the active oxygen species, which is consistent with the findings reported by Leonard  
166 <sup>79</sup>. We further constructed strain *Y. lipolytica* Po1f/HRH with the overexpression of flavanone  
167 3-hydroxylase (SIF3H from *Solanum lycopersicum*) and detected about 26.0 mg/L taxifolin with  
168 a molar yield of 46.5% from naringenin (Fig. 2). In addition, *Y. lipolytica* endogenous CPR  
169 matched F3'H well, with comparable efficiency as CrCPR (Fig. 3b), which is consistent with  
170 previous report that *Y. lipolytica* was capable of performing P450-based biotransformation <sup>80,81</sup>.  
171 To achieve *de novo* synthesis of eriodictyol and taxifolin, we further complemented the RtTAL  
172 with GhF3'H and SIF3H, resulting in strains Po1f/T4SIHR and Po1f/T4SIHRH, respectively.  
173 When these strains were tested in shake flask cultures, we obtained 17.2 mg/L eriodictyol and  
174 11.3 mg/L taxifolin from glucose, respectively. These results validated that *Y. lipolytica* will be  
175 an ideal chassis to functionally express plant P450 enzymes and produce hydroxylated  
176 flavonoids.

### 177 **Tuning gene-copy number to remove pathway bottlenecks**

178 The balance of metabolic flux and mitigation of metabolic burden is a vital factor for  
179 optimizing metabolite production in microorganisms <sup>9, 53, 82</sup>. Introduction of large gene cluster  
180 may result in the host strain losing cellular fitness when the expression of heterologous proteins  
181 exceeds the carrying capacity of the system. For example, metabolic flux improvement by  
182 overexpression of upstream pathways may not be accommodated by downstream pathways <sup>82</sup>;  
183 intermediate accumulation or depletion may reduce cell viability <sup>83</sup>; and overexpressed gene  
184 clusters may overload the cell and elicit cellular stress response <sup>84, 85</sup>. We next attempted to probe  
185 the rate-limiting steps in Module I and Module II by gradually increasing gene copy number of  
186 the genes involved. Gene copy number of each enzymatic step was individually tuned by using  
187 YaliBrick assembly platform <sup>34</sup>. Naringenin production increased by 2.64-fold when the gene  
188 copy number for chalcone synthase (*PhCHS*) increased from one to five (Fig. 4a), indicating that  
189 CHS is the rate-limiting step in Module I. Increasing the gene copy number of other metabolic  
190 genes (RtTAL and Pc4CL) did not have obvious effect on naringenin titer, while increasing the  
191 gene copy number of MsCHI decreased naringenin titer by 34.4% (Fig. 4a). We determined that  
192 the optimal gene copy number for *PhCHS* is 5, as naringenin production was only marginally  
193 increased when the gene copy number was changed from 4 to 5. As larger plasmid may cause  
194 genetic instability, we did not further increase the copy number of *PhCHS*.

195 In Module II, increasing one copy number of *CrCPR* resulted in eriodictyol and taxifolin  
196 titers increasing by 26.8% and 22.3%, reaching 48.1 mg/L and 31.8 mg/L (Fig. 4b), respectively.  
197 Increasing the copy number of *SIF3H* and *GhF3'H* did not have obvious effect on eriodictyol or  
198 taxifolin production (Fig. 4b), indicating that CPR is the rate-limiting step in Module II.  
199 Eriodictyol and taxifolin titers remained stable, when the gene copy number for *CrCPR* was  
200 increased from 2 to 5, suggesting that the optimal ratio of F3'H to its reductase *CrCPR* is 1:2,  
201 which is consistent with previous report <sup>86</sup>. The naringenin-to-eriodictyol and taxifolin



202 conversion ratio reached 90.5% and 56.8%, respectively (Fig. 4b), under the optimal F3'H-CPR  
203 ratios. To achieve *de novo* synthesis of eriodictyol and taxifolin, we complemented the  
204 eriodictyol and taxifolin pathways with the RtTAL pathway. The resulting strains  
205 Po1f/T4S<sub>x5</sub>IHR<sub>x2</sub> and Po1f/T4S<sub>x5</sub>IHR<sub>x2</sub>H produced 28.9 mg/L eriodictyol and 25.2 mg/L  
206 taxifolin from glucose, respectively. These titers are 68.0% and 123.0% higher than the control  
207 strains Po1f/T4SIHR and Po1f/T4SIHRH. These results confirmed that tuning gene copy  
208 numbers will be a critical step to remove pathway bottlenecks and achieve metabolic balance in  
209 genetically modified cell factories, in particularly, oleaginous yeast for flavonoids production.

## 210 **Improving flavonoid production by enhancing precursor synthesis**

211 We next sought to investigate the upstream shikimic acid and malonyl-CoA pathways to  
212 further improve flavonoids production. By supplementing 100 mg/L L-tyrosine with the strain  
213 Po1f/T4SI, we observed that naringenin production was increased by 33.6% with glucose as sole  
214 carbon source, indicating that upstream shikimic acid pathway is a bottleneck for naringenin  
215 synthesis in *Y. lipolytica*. We then overexpressed the pentafunctional polypeptides arom protein  
216 ARO1, which catalyzes steps 2 through 6 in the biosynthesis of chorismate, to boost the  
217 precursor for L-tyrosine synthesis<sup>87</sup>. YALI0F12639g (YIARO1) is a *Y. lipolytica* homologue of  
218 *S. cerevisiae* ARO1<sup>88</sup>, and the DNA sequence for *YIARO1* is composed of 1 intron and 2 exons,  
219 encoding a 1556-aa protein. To mitigate unintended mRNA splicing and transcriptional  
220 regulation, we removed the internal intron for YIARO1. When this *YIARO1* gene was  
221 overexpressed in strain Po1f/T4S<sub>x5</sub>I with optimal Module I settings, naringenin production was  
222 increased to 81.6 mg/L, a 50.9% increased compared to the parental strain (Fig. 5a). When we  
223 combined Module I with Module II, the resulting strains Po1f/AT4S<sub>x5</sub>IHR<sub>x2</sub> and  
224 Po1f/AT4S<sub>x5</sub>IHR<sub>x2</sub>H produced 40.1 mg/L eriodictyol and 33.4 mg/L taxifolin, which is 38.8%  
225 and 32.5% higher than that of the control strains Po1f/T4S<sub>x5</sub>IHR<sub>x2</sub> and Po1f/T4S<sub>x5</sub>IHR<sub>x2</sub>H,  
226 respectively (Fig. 5b).

227 Acetyl-CoA and malonyl-CoA are shared precursors for both lipids and flavonoid pathway  
228<sup>89,90</sup>. However, malonyl-CoA is primarily used to synthesize lipids cell membrane and support  
229 cell growth, leaving only a small amount of acetyl-CoA and malonyl-CoA for heterologous  
230 production. To mitigate this competition, it is desirable to redirect the acetyl/malonyl-CoA flux  
231 from lipid pathway to flavonoid pathway. Acetyl-CoA carboxylase (ACC) converts acetyl-CoA  
232 to malonyl-CoA, which is the first committed step in both lipid and flavonoids biosynthesis<sup>69</sup>.  
233 In order to enhance intracellular malonyl-CoA synthesis, we screened and tested different ACCs  
234 from three sources, including gram-positive bacteria *Corynebacterium glutamicum* ATCC 13032  
235 (*CgACC*), gram-negative bacteria *Escherichia coli* MG1655 (*Ec\_accABCD*), and *Y. lipolytica*  
236 (*YIACCI*, GRYC ID: YALI0C11407g)<sup>91,92</sup>. Biotin-apoprotein ligase modifies ACC by  
237 covalently attaching biotin, which is essential for ACC activity<sup>93</sup>. *EcBirA* and YIBPL1  
238 (YALI0E30591g) are *E. coli* and *Y. lipolytica* homologues of biotin-apoprotein ligase,  
239 respectively<sup>94,95</sup>. Genes encoding *CgACC*, *Ec\_accABCD*, and *YIACCI*, together with their

240 biotin-apoprotein ligases were introduced to the naringenin-producing strain. All three ACCs  
241 could lead to substantial improvement in naringenin production (Fig. 5a), with *YlACC1*  
242 demonstrating most obvious effect. For example, overexpression of *YlACC1* in Po1f/AT4S<sub>x5</sub>I  
243 improved naringenin titer by 61.4%, reaching 131.7 mg/L (Fig. 5a). The coupling of  
244 *Ec\_accABCD* with *EcBirA* also resulted in naringenin production increasing by 22% compared  
245 with the strain without *EcBirA* overexpression, indicating the essential role of biotinylation in  
246 bacterial ACC activity. This is the first report that *EcACC* could be functionally expressed in  
247 oleaginous species. Unlike the bacterial ACC, co-expression of *YlACC1* and *YlBPL1* resulted in  
248 decreased naringenin production (Fig. 5a). This might indicate the endogenous biotin-apoprotein  
249 ligase (*YlBPL1*) is sufficient to biotinylate *ylACC1* in *Y. lipolytica*.

250 We observed that pH value dropped dramatically during the fermentation process (i.e. pH  
251 below 3.5 at the end of flask cultivation), and this could be largely ascribed to the overflowed  
252 metabolism of TCA cycle and respiration<sup>20</sup>. It was recently discovered that acetate secretion  
253 was associated with the CoA-transfer reaction between acetyl-CoA and succinate in *Y. lipolytica*,  
254 encoded by a mitochondrial enzyme *ylACH1* (YALI0E30965)<sup>23</sup>. To recycle acetate, we next  
255 sought to overexpress acetyl-CoA synthetases and convert acetate to acetyl-CoA. We tested three  
256 acetyl-CoA synthetases from *E. coli*, *S. cerevisiae* and *Y. lipolytica* (Fig. 5a). The native version  
257 *YlACS2* demonstrate better effect to recycle acetate. To test the combinatory effects of enhancing  
258 chorismate and acetyl/malonyl-CoA precursors, we overexpressed *YlARO1* along with  
259 *YlACS2*-*YlACC1* in strain Po1f/T4S<sub>x5</sub>I. The resulting strain produced 149.5 mg/L naringenin,  
260 which was 176.3% higher than the titer of the parental strain (Po1f/T4S<sub>x5</sub>I). We further applied  
261 the same strategy to Module II and tested whether overexpression of *ARO1*, *ACC1* and *ACS*  
262 would benefit the accumulation of hydroxylated flavonoids. Overexpression of *YlARO1*  
263 increased eriodictyol and taxifolin production by 38.8% and 32.5%, yielding 40.1 mg/L and 33.4  
264 mg/L (Fig. 5b), respectively. Overexpressing *YlACS2* and *YlACC1* further increased eriodictyol  
265 and taxifolin titers by 41.9% and 52.1%, reaching 56.9 mg/L and 50.8 mg/L, respectively (Fig.  
266 5b). Due to the large size of the plasmid construct (more than 40 kb), we did not further pursue  
267 the synergistic effect of *ARO1*, *ACC1* and *ACS2* in the current work. These results indicated that  
268 manipulation of acetyl-CoA, malonyl-CoA and chorismate pathway was critical to improve  
269 flavonoid production in *Y. lipolytica*.

## 270 **Boosting flavonoid production by bioprocess optimization**

271 The C/N ratio is an important factor for regulating the acetyl-CoA and NADPH fluxes in  
272 *Yarrowia lipolytica*<sup>33</sup>. It has been reported that nitrogen starvation triggers the repression of  
273 TCA cycle and induces lipogenesis in oleaginous species<sup>96,97</sup>. It was recently discovered that  
274 C/N ratio dynamically regulates lipogenic promoter activity in *Y. lipolytica*<sup>33</sup>. In this study, C/N  
275 ratio was optimized in two patterns to improve flavonoid synthesis, by either adjusting the  
276 amount of nitrogen source (ammonia sulfate) or carbon source (glucose). The results showed  
277 that altering (NH<sub>4</sub>)<sub>2</sub>SO<sub>4</sub> content did not have obvious effect on naringenin titer. Slightly higher



278 naringenin titer was achieved at higher C/N ratio (C/N=120) (Supplementary Fig. S2a). On the  
279 contrary, it was clearly shown that higher C/N ratio was advantageous to improving naringenin  
280 titer by increasing the level of glucose. Specifically, naringenin titer was increased about 56%  
281 when the C/N was altered from 40 to 160 (Supplementary Fig. S2b). Since glucose is the direct  
282 precursor for chorismate and malonyl-CoA, it indicates that there is still much space to further  
283 improve the precursor flux in *Y. lipolytica*.

284 In order to produce flavonoids with inexpensive YPD (yeast extract, peptone and dextrose)  
285 medium, we integrated the optimized pathways into *Y. lipolytica* Po1f genome with our recently  
286 developed integration methods<sup>98</sup>. The best-performing strains NarPro/ASC, ErioPro, and  
287 TaxiPro produced 71.2 mg/L naringenin, 54.2 mg/L eriodictyol, and 48.1 mg/L taxifolin in YPD  
288 medium, respectively<sup>40</sup>. We observed that the pH dropped to 3.2 at the end of the fermentation  
289 in YPD, possibly due to the accumulation of various organic acids<sup>20</sup>. We next sought to buffer  
290 the media pH by using either phosphate buffer saline (PBS) or calcium carbonate (CaCO<sub>3</sub>).  
291 Supplementation of 4% CaCO<sub>3</sub> maintained stable pH and improved naringenin titer by 31.2%,  
292 reaching 138.1 mg/L at 144 h, while PBS buffer did not have obvious effect compared with the  
293 control (Supplementary Fig. S4). We also analyzed the combinatory effects of inhibiting fatty  
294 acid synthesis by adding cerulenin<sup>99</sup>, maintaining stable pH, and supplying sodium acetate. The  
295 fermentation time course showed that we could achieve steady improvement in naringenin  
296 production (Supplementary Fig. S5). For example, supplementation of 1 mg/L cerulenin with 40  
297 g/L CaCO<sub>3</sub> further improved naringenin titer by 31.2%, (Supplementary Fig. S5c). However,  
298 supplying 5 mM NaAc did not result in further increase in naringenin production  
299 (Supplementary Fig. S5d). By intermittently feeding glucose after 48 hours, the  
300 chromosomally-integrated strain produced 252.4 mg/L naringenin under optimal conditions (Fig.  
301 6a). Likewise, we tested the eriodictyol and taxifolin production in YPD medium by buffering  
302 media pH with 40 g/L CaCO<sub>3</sub> and inhibiting fatty acid synthesis with 1 mg/L cerulenin. We  
303 observed that strains ErioPro and TaxiPro produced 95.5 mg/L eriodictyol and 79.1 mg/L  
304 taxifolin in 144 h, which were 76.2% and 64.4% higher than that without CaCO<sub>3</sub> and cerulenin.  
305 ErioPro and TaxiPro produced 134.2 mg/L eriodictyol and 110.5 mg/L taxifolin at the end of the  
306 fermentation process (Fig. 6b). These results indicate that *Y. lipolytica* is an ideal platform to  
307 functionally express plant-derived P450 enzymes. By optimizing the bioprocess, we could  
308 substantially improve the titer of naringenin, eriodictyol and taxifolin in  
309 metabolically-engineered oleaginous yeast species.

## 310 **Conclusions**

311 The heterologous production of hydroxylated flavonoids remains a challenging task; and  
312 only limited successful pathway engineering endeavors have been reported to date. Oleaginous  
313 yeast is rich in lipid and internal membrane structures, which provides the hydrophobic lipid  
314 environment and spatially-organized organelles that are critical for plant P450 enzyme

315 functionality. In this report, we validated that *Y. lipolytica* is a superior platform for heterologous  
316 production of high value flavonoids and hydroxylated flavonoids. By modular construction and  
317 characterization of various genes involved in plant flavonoid biosynthesis, we determined that  
318 chalcone synthase (CHS), flavanone 3-hydroxylase (F3H) and cytochrome c P450 reductase  
319 (CrCPR) were the critical steps to engineer flavonoid production in *Y. lipolytica*. Coupling with  
320 the upstream amino acid degradation pathway (tyrosine ammonia lyase from *Rhodotorula*  
321 *glutinis*), for the first time, we achieved *de novo* production of naringenin, eriodictyol and  
322 taxifolin from glucose in *Y. lipolytica*. By using a modular cloning platform to assemble multiple  
323 genetic constructs, we further determined the optimal gene copy ratio for CHS, F3H and CrCPR  
324 to cooperatively improve flavonoids and hydroxylated flavonoids production. We then unleashed  
325 the metabolic potential of the yeast host by screening and testing a number of precursor  
326 pathways, including the acetyl-CoA synthetase, acetyl-CoA carboxylase and chorismate pathway  
327 (the pentafunctional AROM polypeptide ARO1). Coupled with the optimized chalcone synthase  
328 module and the hydroxylation module, our engineering strategies synergistically removed  
329 pathway bottlenecks and led to a 15.8-fold, 6.9-fold and 8.8-fold improvement in naringenin,  
330 eriodictyol and taxifolin production, respectively. Collectively, these findings demonstrate our  
331 abilities to harness oleaginous yeast as microbial workhorse to expand nature's biosynthetic  
332 potential, which allows us to produce complex natural products from cheap feedstocks.

## 333 **Materials and methods**

### 334 **Genes, plasmids, and strains**

335 Genes encoding *Rhodotorula R. toruloides* tyrosine ammonia lyase (*RtTAL*), *Petroselinum*  
336 *crispum* (parsley) 4-coumarate-CoA ligase (*Pc4CL*), *Petunia x hybrid* chalcone synthase  
337 (*PhCHS*), *Medicago sativa* chalcone isomerase (*MsCHI*), *Escherichia coli* acetyl-CoA  
338 synthetase (*EcACS*), and *Corynebacterium glutamicum* ATCC 13032 acetyl-CoA carboxylase  
339 (*CgACC*) were frozen stocks of our laboratory. Genes encoding *Solanum lycopersicum*  
340 4-coumarate-CoA ligase (*Sl4CL*), *Hordeum vulgare* chalcone synthase (*HvCHS2*), *Petunia x*  
341 *hybrid* chalcone isomerase (*PhCHI*), *Gerbera hybrid* flavonoid 3'-hydroxylase (*GhF3'H*),  
342 *Glycine max* flavonoid 3'-hydroxylase (*GmF3'H*), *Catharanthus roseus* cytochrome P450  
343 reductase (*CrCPR*), and *Solanum lycopersicum* flavanone 3-hydroxylase (*SIF3H*) were  
344 optimized and synthesized by GenScript (Nanjing, China). Genes encoding *Yarrowia lipolytica*  
345 pentafunctional arom protein (*YLARO1*), *Yarrowia lipolytica* cytochrome P450 reductase  
346 (*YICPR*), *Yarrowia lipolytica* acetyl-CoA synthetase (*YLACS2*) were amplified from *Yarrowia*  
347 *lipolytica* Po1f genomic DNA by PCR. *Saccharomyces cerevisiae* cytochrome P450 reductase  
348 (*ScCPR1*) and *Saccharomyces cerevisiae* acetyl-CoA synthetase (*ScACS2*) were amplified from  
349 *Saccharomyces cerevisiae* genomic DNA by PCR. Genes used in this project were listed in  
350 Supplementary Table S1.

351 Plasmid pYLXP' was a stock of our laboratory<sup>89</sup>. Plasmid pYLXP'2 was constructed by

352 replacing *LEU2* marker with *URA3* marker. Both pYLXP' and pYLXP'2 were YaliBrick  
353 plasmids and used for flavonoid pathway construction<sup>34</sup>. *Escherichia coli* (*E. coli*) NEB 5a was  
354 used for plasmid construction, propagation, and maintenance. *Yarrowia lipolytica* (*Y. lipolytica*)  
355 Po1f (ATCC MYA-2613, MATA ura3-302 leu2-270 xpr2-322 axp2-deltaNU49 XPR2::SUC2)  
356 was used as the chassis to construct flavonoid pathways.

357 To achieve *de novo* synthesis of eriodictyol and taxifolin, we transformed  
358 pYLXP'2-GhF3'H-CrCPR and pYLXP'2-GhF3'H-CrCPR-SIF3H into Po1f/T4SI, resulting in  
359 Po1f/T4SIHR and Po1f/T4SIHRH, respectively. The strain containing 5 copies of *PhCHS* was  
360 named as Po1f/T4S<sub>x5</sub>I. We chose to use the plasmids pYLXP'2-HR<sub>x2</sub> and pYLXP'2-HR<sub>x2</sub>H,  
361 which contain 2 copies of *CrCPR*, to construct eriodictyol and taxifolin pathways. To achieve *de*  
362 *nov*o synthesis of eriodictyol and taxifolin, strains Po1f/T4S<sub>x5</sub>IHR<sub>x2</sub> and Po1f/T4S<sub>x5</sub>IHR<sub>x2</sub>H  
363 were constructed by transforming plasmids pYLXP'2-HR<sub>x2</sub> and pYLXP'2-HR<sub>x2</sub>H into strain  
364 Po1f/T4S<sub>x5</sub>I, respectively. We over-expressed *YIARO1* along with *YIACS2*-*YIACC1* in strain  
365 Po1f/T4S<sub>x5</sub>I, and name the new strain as Po1f/AT4S<sub>x5</sub>I-*YIACS2*-*YIACC1*. By introducing  
366 Module II into strains Po1f/AT4S<sub>x5</sub>I and Po1f/AT4S<sub>x5</sub>I-*YIACS2*-*YIACC1*, we obtained  
367 eriodictyol producing strains Po1f/AT4S<sub>x5</sub>IHR<sub>x2</sub> and Po1f/AT4S<sub>x5</sub>IHR<sub>x2</sub>-*YIACS2*-*YIACC1* and  
368 taxifolin producing strains Po1f/AT4S<sub>x5</sub>IHR<sub>x2</sub>H and Po1f/AT4S<sub>x5</sub>IHR<sub>x2</sub>H-*YIACS2*-*YIACC1*.  
369 Strains constructed in this project were listed in Supplementary Table S2.

### 370 **Pathway construction**

371 Genes *RtTAL*, *Pc4CL*, *PhCHS*, *MsCHI*, *EcACS*, *CgACC*, *YICPR*, *YIACS2*, *ScCPR1*, and  
372 *ScACS2* were amplified using respective primers listed in Supplementary Table S3. The PCR  
373 product was assembled with *SnaBI* digested pYLXP' or pYLXP'2 using Gibson Assembly  
374 method. *YIARO1* is composed of 2 exons and 1 intron. The exons were amplified by using  
375 primer pairs ARO1\_up F/ARO1\_up R and ARO1\_down F/ARO1\_down R respectively. The  
376 resulting PCR products were assembled with *SnaBI* digested pYLXP' to yield pYLXP'-*ARO1*,  
377 removing the intron sequence. For gene expression, the start codon was removed and a nucleic  
378 acid sequence "TAACCGCAG" was added at the upstream of coding gene to complete the  
379 intron<sup>34</sup>.

380 The YaliBrick method was used to assemble the synthetic pathways<sup>34</sup>. pYLXP' derived  
381 plasmids were used to assemble the pathways of Module I, while pYLXP'2 derived plasmids  
382 were used to assemble the pathways of Module II and ACS and ACC. Generally, the donor  
383 plasmids were digested with *AvrII/SaII*, and the destination plasmids were digested with  
384 *NheI/SaII*. The resulting plasmids containing monocistronic configurations were obtained by T4  
385 ligation. For the assemble of genes containing any of these isocaudomers, other isocaudomers  
386 were used. Specifically, the donor plasmid pYLXP'-*YIARO1* was digested with *HpaI/NheI*, and  
387 the destination plasmid pYLXP'-T4S<sub>x5</sub>I was digested with *HpaI/AvrII*. The resulting plasmid  
388 pYLXP'-AT4S<sub>x5</sub>I was obtained by inserting *YIARO1* into pYLXP'-T4S<sub>x5</sub>I using T4 ligation. The  
389 donor plasmid pYLXP'2-HR<sub>x2</sub>H was digested with *Clal/NheI*, and the destination plasmid

390 pYLXP'2-ScACS2-YIACC1 was digested with *ClaI/AvrII*. The resulting plasmid  
391 pYLXP'2-HR<sub>x2</sub>H-ScACS2-YIACC1 was obtained by inserting genes GhF3'H-CrCPR<sub>x2</sub>-SIF3H  
392 into pYLXP'2-ScACS2-YIACC1 using T4 ligation. Plasmids pYLXP'2-YIACC1,  
393 pYLXP'2-EcACCABCD-EcBirA, and pYLXP'2-YIBPL1 were frozen stocks of our laboratory  
394 <sup>34</sup>. Plasmids used in this paper were listed in Supplementary Table S4.

### 395 **Yeast transformation and screening**

396 The lithium acetate (LiAc) method was used for the transformation. *Y. lipolytica* was  
397 cultured on YPD plate at 30°C for 16-22 h. The transformation solution was prepared as follows:  
398 90 µL 50% PEG4000, 5 µL 2 M LiAc, 5 µL boiled single strand DNA (salmon sperm,  
399 denatured), and 200-500 ng plasmid DNA. The transformation solution was mixed well by  
400 vortexing before use. Next, the yeast was transferred to the transformation solution, and mixed  
401 well by vortexing for at least 10 seconds. The transformation mixtures were then incubated at  
402 30°C for 30-45 min. The transformation mixture was then vortexed for 15 seconds every 10  
403 minutes, followed by an additional 10 min heat shock at 39°C to increase transformation  
404 efficiency. For the transformation of pYLXP' and derivative plasmids, the mixture was plated on  
405 leucine drop-out complete synthetic media (CSM-Leu). For the transformation of pYLXP'2 and  
406 derivative plasmids, the mixture was plated on uracil drop-out complete synthetic media  
407 (CSM-Ura). For the transformation of both plasmids, the mixture was plated on leucine and  
408 uracil drop-out complete synthetic media (CSM-Leu-Ura). Strains NarPro/ASC, ErioPro, and  
409 TaxiPro were constructed in previous work <sup>40</sup>. Strains used in this paper were listed in Strains  
410 constructed in this project were listed in Supplementary Table S2.

### 411 **Cultivation and pH control**

412 The seed was cultured in regular leucine, or uracil, or leucine and uracil drop-out complete  
413 synthetic media (CSM-Leu, or CSM-Ura, or CSM-Leu-Ura) at 30°C for 2 days. The seed culture  
414 was inoculated to 25 mL nitrogen-limited media (C/N = 80) to a final concentration of 2% (v/v).  
415 The fermentation was carried out in 250 mL shak flask at 30°C 220 rpm. C/N ratio was  
416 optimized by two patterns: i) fixing glucose content (40 g/L) and altering (NH<sub>4</sub>)<sub>2</sub>SO<sub>4</sub> content; ii)  
417 fixing (NH<sub>4</sub>)<sub>2</sub>SO<sub>4</sub> content (0.73348 g/L) and altering glucose content. To analyze the effect of  
418 cerulenin, oleic acid, and sodium acetate (NaAc) on flavonoid synthesis, a final concentration of  
419 5 g/L oleic acid or 1 mM NaAc was added at the starting point, while a final concentration of 1  
420 mg/L cerulenin was added at 48 h. To buffer the acidity, 20 mM phosphate buffer saline (PBS,  
421 Na<sub>2</sub>HPO<sub>4</sub>-NaH<sub>2</sub>PO<sub>4</sub>) or 40 g/L CaCO<sub>3</sub> was used respectively. In the fed-batch fermentation, the  
422 starting glucose concentration was 40 g/L, and a final concentration of 10 g/L glucose was added  
423 every 24 h from 48 h.

### 424 **Analytical methods**

425 Samples were taken at 144 h. In the fed-batch fermentation, samples were taken every 24 h.  
426 For naringenin, eriodictyol, and taxifolin analysis, samples were diluted in methanol; whole for

427 glucose analysis, samples were diluted in H<sub>2</sub>O. Samples were shaken with glass beads to release  
428 the metabolites for analysis. Naringenin, eriodictyol, taxifolin, and glucose were analyzed using  
429 Agilent HPLC 1220 as previously described<sup>40</sup>.

### 430 **Acknowledgements**

431 This work was supported by the Cellular & Biochem Engineering Program of the National  
432 Science Foundation under grant no.1805139, the National Natural Science Foundation of China  
433 (31670095, 31770097), the Fundamental Research Funds for the Central Universities  
434 (JUSRP51701A), the Distinguished Professor Project of Jiangsu Province. The authors would  
435 also like to acknowledge the Department of Chemical, Biochemical and Environmental  
436 Engineering at University of Maryland Baltimore County for funding support. YL would like to  
437 thank the China Scholarship Council for funding support.

### 438 **Author contributions**

439 PX and JZ conceived the topic. YL performed genetic engineering and fermentation experiments.  
440 YL and PX wrote the manuscript. JZ and MK revised the manuscript.

### 441 **Conflicts of interests**

442 A provisional patent has been filed based on the results of this study.

443

## 444 **References**

- 445 1. Atanasov, A. G.; Waltenberger, B.; Pferschy-Wenzig, E.-M.; Linder, T.; Wawrosch, C.; Uhrin, P.;  
446 Temml, V.; Wang, L.; Schwaiger, S.; Heiss, E. H.; Rollinger, J. M.; Schuster, D.; Breuss, J. M.;  
447 Bochkov, V.; Mihovilovic, M. D.; Kopp, B.; Bauer, R.; Dirsch, V. M.; Stuppner, H., Discovery and  
448 resupply of pharmacologically active plant-derived natural products: A review. *Biotechnology Advances* **2015**,  
449 *33* (8), 1582-1614.
- 450 2. Chemler, J.; Koffas, M., Metabolic engineering for plant natural product biosynthesis in microbes. *Current*  
451 *Opinion in Biotechnology* **2008**, 597-605.
- 452 3. Chemler, J.; Yan, Y.; Koffas, M., Biosynthesis of isoprenoids, polyunsaturated fatty acids and flavonoids in  
453 *Saccharomyces cerevisiae*. *Microbial Cell Factories* **2006**, -.
- 454 4. Keasling, J., Manufacturing Molecules Through Metabolic Engineering. *Science* **2010**, *330* (6009), 1355-1358.
- 455 5. Lee, J. W.; Kim, T. Y.; Jang, Y. S.; Choi, S.; Lee, S. Y., Systems metabolic engineering for chemicals and  
456 materials. *Trends Biotechnol* **2011**, *29* (8), 370-8.
- 457 6. Leonard, E.; Nielsen, D.; Solomon, K.; Prather, K., Engineering microbes with synthetic biology  
458 frameworks. *Trends in Biotechnology* **2008**, *26* (12), 674-681.
- 459 7. Medema, M.; Breitling, R.; Bovenberg, R.; Takano, E., Exploiting plug-and-play synthetic biology for drug  
460 discovery and production in microorganisms. *Nature Reviews Microbiology* **2011**, 131-137.
- 461 8. Smanski, M. J.; Zhou, H.; Claesen, J.; Shen, B.; Fischbach, M. A.; Voigt, C. A., Synthetic biology to  
462 access and expand nature's chemical diversity. *Nat Rev Micro* **2016**, *14* (3), 135-149.
- 463 9. Xu, P.; Bhan, N.; Koffas, M. A. G., Engineering plant metabolism into microbes: from systems biology to  
464 synthetic biology. *Current Opinion in Biotechnology* **2013**, *24* (2), 291-299.
- 465 10. Palmer, C. M.; Alper, H. S., Expanding the chemical palette of industrial microbes: metabolic engineering for  
466 type III pks-derived polyketides. *Biotechnol J.* **2018**, *14*.
- 467 11. Yuan, S.-F.; Alper, H. S., Metabolic engineering of microbial cell factories for production of nutraceuticals.  
468 *Microbial Cell Factories* **2019**, *18* (1), 46.
- 469 12. Xiu, Y.; Jang, S.; Jones, J. A.; Zill Nicholas, A.; Linhardt Robert, J.; Yuan, Q.; Jung Gyoo, Y.;  
470 Koffas Mattheos, A. G., Naringenin-responsive riboswitch-based fluorescent biosensor module for *Escherichia*  
471 *coli* co-cultures. *Biotechnology and Bioengineering* **2017**, *114* (10), 2235-2244.
- 472 13. Zha, J.; Koffas, M. A. G., Anthocyanin Production in Engineered Microorganisms. In *Biotechnology of Natural*  
473 *Products*, Schwab, W.; Lange, B. M.; Wüst, M., Eds. Springer International Publishing: Cham, 2018; pp  
474 81-97.
- 475 14. Zang, Y.; Zha, J.; Wu, X.; Zheng, Z.; Ouyang, J.; Koffas, M. A. G., In vitro Naringenin Biosynthesis  
476 from p-Coumaric Acid Using Recombinant Enzymes. *Journal of Agricultural and Food Chemistry* **2019**.



- 477 15. Blazeck, J.; Hill, A.; Liu, L.; Knight, R.; Miller, J.; Pan, A.; Otoupal, P.; Alper, H. S., Harnessing  
478 *Yarrowia lipolytica* lipogenesis to create a platform for lipid and biofuel production. *Nat Commun* **2014**, *5*,  
479 3131.
- 480 16. Xu, P.; Qiao, K.; Stephanopoulos, G., Engineering oxidative stress defense pathways to build a robust lipid  
481 production platform in *Yarrowia lipolytica*. *Biotechnol Bioeng* **2017**, *114* (7), 1521-1530.
- 482 17. Bailey, R.; Madden, K. T.; Trueheart, J. Production of carotenoids in oleaginous yeast and fungi. US  
483 7,851,199, 2010.
- 484 18. Sharpe, P. L.; Rick, W. Y.; Zhu, Q. Q. Carotenoid production in a recombinant oleaginous yeast. US  
485 8,846,374, 2014.
- 486 19. Qiao, K. J.; Wasylenko, T. M.; Zhou, K.; Xu, P.; Stephanopoulos, G., Lipid production in *Yarrowia*  
487 *lipolytica* is maximized by engineering cytosolic redox metabolism. *Nat. Biotechnol.* **2017**, *35* (2), 173-177.
- 488 20. Markham, K. A.; Palmer, C. M.; Chwatko, M.; Wagner, J. M.; Murray, C.; Vazquez, S.;  
489 Swaminathan, A.; Chakravarty, I.; Lynd, N. A.; Alper, H. S., Rewiring *Yarrowia lipolytica* toward triacetic  
490 acid lactone for materials generation. *Proc. Natl. Acad. Sci. U. S. A.* **2018**, *115* (9), 2096-2101.
- 491 21. Larroude, M.; Celinska, E.; Back, A.; Thomas, S.; Nicaud, J. M.; Ledesma-Amaro, R., A synthetic  
492 biology approach to transform *Yarrowia lipolytica* into a competitive biotechnological producer of  $\beta$ -carotene.  
493 *Biotechnol. Bioeng.* **2018**, *115* (2), 464-472.
- 494 22. Groenewald, M.; Boekhout, T.; Neuvéglise, C.; Gaillardin, C.; van Dijck, P. W. M.; Wyss, M., *Yarrowia*  
495 *lipolytica*: Safety assessment of an oleaginous yeast with a great industrial potential. *Critical Reviews in*  
496 *Microbiology* **2014**, *40* (3), 187-206.
- 497 23. Cui, Z.; Gao, C.; Li, J.; Hou, J.; Lin, C. S. K.; Qi, Q., Engineering of unconventional yeast *Yarrowia*  
498 *lipolytica* for efficient succinic acid production from glycerol at low pH. *Metabolic Engineering* **2017**, *42*,  
499 126-133.
- 500 24. Abghari, A.; Chen, S., *Yarrowia lipolytica* as an oleaginous cell factory platform for the production of fatty  
501 acid-based biofuel and bioproducts. *Frontiers in Energy Research* **2014**, *2*.
- 502 25. Ledesma-Amaro, R.; Lazar, Z.; Rakicka, M.; Guo, Z.; Fouchard, F.; Coq, A.-M. C.-L.; Nicaud, J.-M.,  
503 Metabolic engineering of *Yarrowia lipolytica* to produce chemicals and fuels from xylose. *Metabolic*  
504 *Engineering* **2016**, *38*, 115-124.
- 505 26. Li, H.; Alper, H. S., Enabling xylose utilization in *Yarrowia lipolytica* for lipid production. *Biotechnology*  
506 *Journal* **2016**, *11* (9), 1230-1240.
- 507 27. Rodriguez, G. M.; Hussain, M. S.; Gambill, L.; Gao, D.; Yaguchi, A.; Blenner, M., Engineering xylose  
508 utilization in *Yarrowia lipolytica* by understanding its cryptic xylose pathway. *Biotechnology for Biofuels* **2016**,  
509 *9* (1), 149.
- 510 28. Bordes, F.; Fudalej, F.; Dossat, V.; Nicaud, J. M.; Marty, A., A new recombinant protein expression  
511 system for high-throughput screening in the yeast *Yarrowia lipolytica*. *J Microbiol Methods* **2007**, *70* (3),

- 512 493-502.
- 513 29. Juretzek, T.; Le Dall, M.; Mauersberger, S.; Gaillardin, C.; Barth, G.; Nicaud, J., Vectors for gene  
514 expression and amplification in the yeast *Yarrowia lipolytica*. *Yeast* **2001**, *18* (2), 97-113.
- 515 30. Nicaud, J. M.; Madzak, C.; Broek, P.; Gysler, C.; Duboc, P.; Niederberger, P.; Gaillardin, C., Protein  
516 expression and secretion in the yeast *Yarrowia lipolytica*. *FEMS Yeast Res* **2002**, *2*.
- 517 31. Blazeck, J.; Liu, L.; Redden, H.; Alper, H., Tuning gene expression in *Yarrowia lipolytica* by a hybrid  
518 promoter approach. *Appl Environ Microbiol* **2011**, *77*.
- 519 32. Blazeck, J.; Reed, B.; Garg, R.; Gerstner, R.; Pan, A.; Agarwala, V.; Alper, H. S., Generalizing a  
520 hybrid synthetic promoter approach in *Yarrowia lipolytica*. *Appl Microbiol Biotechnol* **2013**, *97*.
- 521 33. Liu, H.; Marsafari, M.; Deng, L.; Xu, P., Understanding lipogenesis by dynamically profiling  
522 transcriptional activity of lipogenic promoters in *Yarrowia lipolytica*. *Applied Microbiology and Biotechnology*  
523 **2019**, *103* (7), 3167-3179.
- 524 34. Wong, L.; Engel, J.; Jin, E.; Holdridge, B.; Xu, P., YaliBricks, a versatile genetic toolkit for streamlined  
525 and rapid pathway engineering in *Yarrowia lipolytica*. *Metab. Eng. Commun.* **2017**, *5*, 68-77.
- 526 35. Wong, L.; Holdridge, B.; Engel, J.; Xu, P., Genetic Tools for Streamlined and Accelerated Pathway  
527 Engineering in *Yarrowia lipolytica*. In *Microbial Metabolic Engineering: Methods and Protocols*, Santos, C. N.  
528 S.; Ajikumar, P. K., Eds. Springer New York: New York, NY, 2019; pp 155-177.
- 529 36. Celińska, E.; Ledesma-Amaro, R.; Larroude, M.; Rossignol, T.; Pauthenier, C.; Nicaud, J.-M., Golden  
530 Gate Assembly system dedicated to complex pathway manipulation in *Yarrowia lipolytica*. *Microbial*  
531 *Biotechnology* **2017**, *10* (2), 450-455.
- 532 37. Wagner, J. M.; Williams, E. V.; Alper, H. S., Developing a piggyBac Transposon System and Compatible  
533 Selection Markers for Insertional Mutagenesis and Genome Engineering in *Yarrowia lipolytica*. *Biotechnology*  
534 *Journal* **2018**, *13* (5), 1800022.
- 535 38. Schwartz, C. M.; Hussain, M. S.; Blenner, M.; Wheeldon, I., Synthetic RNA polymerase III promoters  
536 facilitate high-efficiency CRISPR-Cas9-mediated genome editing in *Yarrowialipolytica*. *ACS Synth Biol* **2016**,  
537 *5*.
- 538 39. Morse, N. J.; Wagner, J. M.; Reed, K. B.; Gopal, M. R.; Lauffer, L. H.; Alper, H. S., T7 Polymerase  
539 Expression of Guide RNAs in vivo Allows Exportable CRISPR-Cas9 Editing in Multiple Yeast Hosts. *ACS*  
540 *Synthetic Biology* **2018**, *7* (4), 1075-1084.
- 541 40. Lv, Y.; Edwards, H.; Zhou, J.; Xu, P., Combining 26s rDNA and the Cre-loxP system for iterative gene  
542 integration and efficient marker curation in *Yarrowia lipolytica*. *ACS Synth. Biol.* **2019**.
- 543 41. Dixon, R. A.; Pasinetti, G. M., Flavonoids and Isoflavonoids: From Plant Biology to Agriculture and  
544 Neuroscience. *Plant Physiology* **2010**, *154* (2), 453.
- 545 42. Pandey, R. P.; Parajuli, P.; Koffas, M. A. G.; Sohng, J. K., Microbial production of natural and non-natural

- 546 flavonoids: Pathway engineering, directed evolution and systems/synthetic biology. *Biotechnology Advances*  
547 **2016**, *34* (5), 634-662.
- 548 43. Benavente-Garcia, O.; Castillo, J.; Alcaraz, M.; Vicente, V.; Del Rio, J.; Ortuno, A., Beneficial action  
549 of Citrus flavonoids on multiple cancer-related biological pathways. *Current Cancer Drug Targets* **2007**,  
550 795-809.
- 551 44. Benavente-García, O.; Castillo, J., Update on uses and properties of citrus flavonoids: new findings in  
552 anticancer, cardiovascular, and anti-inflammatory activity. *J Agric Food Chem* **2008**, *56* (15), 6185-205.
- 553 45. Butelli, E.; Titta, L.; Giorgio, M.; Mock, H.-P.; Matros, A.; Peterek, S.; Schijlen, E. G. W. M.;  
554 Hall, R. D.; Bovy, A. G.; Luo, J.; Martin, C., Enrichment of tomato fruit with health-promoting  
555 anthocyanins by expression of select transcription factors. *Nature Biotechnology* **2008**, *26*, 1301.
- 556 46. Xu, P.; Ranganathan, S.; Fowler, Z.; Maranas, C.; Koffas, M., Genome-scale metabolic network  
557 modeling results in minimal interventions that cooperatively force carbon flux towards malonyl-CoA.  
558 *Metabolic Engineering* **2011**, *13* (5), 578-587.
- 559 47. Santos, C. N. S.; Koffas, M.; Stephanopoulos, G., Optimization of a heterologous pathway for the production  
560 of flavonoids from glucose. *Metabolic Engineering* **2011**, *13* (4), 392-400.
- 561 48. Leonard, E.; Yan, Y.; Lim, K.; Koffas, M., Investigation of two distinct flavone synthases for plant-specific  
562 flavone biosynthesis in *Saccharomyces cerevisiae*. *Applied and Environmental Microbiology* **2005**, 8241-8248.
- 563 49. Leonard, E.; Lim, K.; Saw, P.; Koffas, M., Engineering central metabolic pathways for high-level flavonoid  
564 production in *Escherichia coli*. *Applied and Environmental Microbiology* **2007**, 3877-3886.
- 565 50. Lim, C.; Fowler, Z.; Hueller, T.; Schaffer, S.; Koffas, M., High-Yield Resveratrol Production in  
566 Engineered *Escherichia coli*. *Applied and Environmental Microbiology* **2011**, 3451-3460.
- 567 51. Li, M.; Kildegaard, K. R.; Chen, Y.; Rodriguez, A.; Borodina, I.; Nielsen, J., De novo production of  
568 resveratrol from glucose or ethanol by engineered *Saccharomyces cerevisiae*. *Metab Eng* **2015**, *32*.
- 569 52. Li, M.; Schneider, K.; Kristensen, M.; Borodina, I.; Nielsen, J., Engineering yeast for high-level  
570 production of stilbenoid antioxidants. *Sci Rep* **2016**, *6*.
- 571 53. Wu, J. J.; Liu, P. R.; Fan, Y. M.; Bao, H.; Du, G. C.; Zhou, J. W.; Chen, J., Multivariate modular  
572 metabolic engineering of *Escherichia coli* to produce resveratrol from L-tyrosine. *J. Biotechnol.* **2013**, *167* (4),  
573 404-411.
- 574 54. Bhan, N.; Xu, P.; Khalidi, O.; Koffas, M. A. G., Redirecting carbon flux into malonyl-CoA to improve  
575 resveratrol titers: Proof of concept for genetic interventions predicted by OptForce computational framework.  
576 *Chemical Engineering Science* **2013**, *103*, 109-114.
- 577 55. Wu, J.; Du, G.; Zhou, J.; Chen, J., Metabolic engineering of *Escherichia coli* for (2S)-pinocembrin  
578 production from glucose by a modular metabolic strategy. *Metabolic Engineering* **2013**, *16*, 48-55.
- 579 56. Yan, Y.; Chemler, J.; Huang, L.; Martens, S.; Koffas, M., Metabolic engineering of anthocyanin

- 580 biosynthesis in *Escherichia coli*. *Applied and Environmental Microbiology* **2005**, 3617-3623.
- 581 57. Yan, Y.; Li, Z.; Koffas, M., High-yield anthocyanin biosynthesis in engineered *Escherichia coli*.  
582 *Biotechnology and Bioengineering* **2008**, 126-140.
- 583 58. Lim, C. G.; Wong, L.; Bhan, N.; Dvora, H.; Xu, P.; Venkiteswaran, S.; Koffas, M. A., Development  
584 of a Recombinant *Escherichia coli* strain for Overproduction of Plant Pigment, Anthocyanin. *Appl Environ*  
585 *Microbiol* **2015**.
- 586 59. Rodriguez, A.; Strucko, T.; Stahlhut, S. G.; Kristensen, M.; Svendsen, D. K.; Forster, J.; Nielsen, J.;  
587 Borodina, I., Metabolic engineering of yeast for fermentative production of flavonoids. *Bioresour Technol*  
588 **2017**, 245.
- 589 60. Lv, Y.; Xu, S.; Lyu, Y.; Zhou, S.; Du, G.; Chen, J.; Zhou, J., Engineering enzymatic cascades for the  
590 efficient biotransformation of eugenol and taxifolin to silybin and isosilybin. *Green Chemistry* **2019**, 21 (7),  
591 1660-1667.
- 592 61. Li, J.; Tian, C.; Xia, Y.; Mutanda, I.; Wang, K.; Wang, Y., Production of plant-specific flavones  
593 baicalein and scutellarein in an engineered *E. coli* from available phenylalanine and tyrosine. *Metabolic*  
594 *Engineering* **2019**, 52, 124-133.
- 595 62. Winkel-Shirley, B., Flavonoid Biosynthesis. A Colorful Model for Genetics, Biochemistry, Cell Biology, and  
596 Biotechnology. *Plant Physiology* **2001**, 126 (2), 485.
- 597 63. Lin, Y.; Yan, Y., Biotechnological production of plant-specific hydroxylated phenylpropanoids. *Biotechnology*  
598 *and Bioengineering* **2014**, 111 (9), 1895-1899.
- 599 64. Leonard, E.; Koffas, M., Engineering of artificial plant cytochrome p450 enzymes for synthesis of isoflavones  
600 by *Escherichia coli*. *Applied and Environmental Microbiology* **2007**, 7246-7251.
- 601 65. Negretti, S.; Narayan, A. R. H.; Chiou, K. C.; Kells, P. M.; Stachowski, J. L.; Hansen, D. A.; Podust,  
602 L. M.; Montgomery, J.; Sherman, D. H., Directing Group-Controlled Regioselectivity in an Enzymatic C–H  
603 Bond Oxygenation. *Journal of the American Chemical Society* **2014**, 136 (13), 4901-4904.
- 604 66. Eichmann, T. O.; Kumari, M.; Haas, J. T.; Farese, R. V.; Zimmermann, R.; Lass, A.; Zechner, R.,  
605 Studies on the Substrate and Stereo/Regioselectivity of Adipose Triglyceride Lipase, Hormone-sensitive  
606 Lipase, and Diacylglycerol-O-acyltransferases. *Journal of Biological Chemistry* **2012**, 287 (49), 41446-41457.
- 607 67. Aoyama, T.; Korzekwa, K.; Nagata, K.; Adesnik, M.; Reiss, A.; Lapenson, D. P.; Gillette, J.;  
608 Gelboin, H. V.; Waxman, D. J.; Gonzalez, F. J., Sequence requirements for cytochrome P-450IIB1 catalytic  
609 activity. Alteration of the stereospecificity and regioselectivity of steroid hydroxylation by a simultaneous  
610 change of two hydrophobic amino acid residues to phenylalanine. *Journal of Biological Chemistry* **1989**, 264  
611 (35), 21327-21333.
- 612 68. Kotopka, B. J.; Li, Y.; Smolke, C. D., Synthetic biology strategies toward heterologous phytochemical  
613 production. *Natural Product Reports* **2018**, 35 (9), 902-920.
- 614 69. Fowler, Z. L.; Gikandi, W. W.; Koffas, M. A., Increased malonyl coenzyme A biosynthesis by tuning the

- 615 *Escherichia coli* metabolic network and its application to flavanone production. *Appl. Environ. Microbiol.*  
616 **2009**, *75* (18), 5831-9.
- 617 70. Johnson, A. O.; Gonzalez-Villanueva, M.; Wong, L.; Steinbüchel, A.; Tee, K. L.; Xu, P.; Wong, T. S.,  
618 Design and application of genetically-encoded malonyl-CoA biosensors for metabolic engineering of microbial  
619 cell factories. *Metabolic Engineering* **2017**, *44*, 253-264.
- 620 71. Zha, W. J.; Rubin-Pitel, S. B.; Shao, Z. Y.; Zhao, H. M., Improving cellular malonyl-CoA level in  
621 *Escherichia coli* via metabolic engineering. *Metab. Eng.* **2009**, *11* (3), 192-198.
- 622 72. Nthangeni, M. B.; Urban, P.; Pompon, D.; Smit, M. S.; Nicaud, J. M., The use of *Yarrowia lipolytica* for  
623 the expression of human cytochrome P450CYP1A1. *Yeast* **2004**, *21* (7), 583-592.
- 624 73. Zhang, H.; Stephanopoulos, G., Engineering *E. coli* for caffeic acid biosynthesis from renewable sugars.  
625 *Applied Microbiology and Biotechnology* **2013**, *97* (8), 3333-3341.
- 626 74. Ferrara, M. A.; Almeida, D. S.; Siani, A. C.; Lucchetti, L.; Lacerda, P. S. B.; Freitas, A.; Tappin, M.  
627 R. R.; Bon, E. P. S., Bioconversion of R-(+)-limonene to perillic acid by the yeast *Yarrowia lipolytica*.  
628 *Brazilian Journal of Microbiology* **2013**, *44*, 1075-1080.
- 629 75. van Rensburg, E.; Moleleki, N.; van der Walt, J. P.; Botes, P. J.; van Dyk, M. S., Biotransformation of  
630 (+)limonene and (-)piperitone by yeasts and yeast-like fungi. *Biotechnology Letters* **1997**, *19* (8), 779-782.
- 631 76. Wong, L.; Engel, J.; Jin, E.; Holdridge, B.; Xu, P., YaliBricks, a versatile genetic toolkit for streamlined  
632 and rapid pathway engineering in *Yarrowia lipolytica*. *Metabolic Engineering Communications* **2017**, *5*  
633 (Supplement C), 68-77.
- 634 77. Rittle, J.; Green, M. T., Cytochrome P450 compound I: capture, characterization, and C-H bond activation  
635 kinetics. *Science* **2010**, *330* (6006), 933-7.
- 636 78. Parage, C.; Foureau, E.; Kellner, F.; Burlat, V.; Mahroug, S.; Lanoue, A.; Dugé de Bernonville, T.;  
637 Londono, M. A.; Carqueijeiro, I.; Oudin, A.; Besseau, S.; Papon, N.; Glévarec, G.; Atehortúa, L.;  
638 Giglioli-Guivarc'h, N.; St-Pierre, B.; Clastre, M.; O'Connor, S. E.; Courdavault, V., Class II Cytochrome  
639 P450 Reductase Governs the Biosynthesis of Alkaloids. *Plant Physiology* **2016**, *172* (3), 1563.
- 640 79. Leonard, E.; Yan, Y.; Lim, K. H.; Koffas, M. A. G., Investigation of Two Distinct Flavone Synthases for  
641 Plant-Specific Flavone Biosynthesis in *Saccharomyces cerevisiae*. *Applied and Environmental*  
642 *Microbiology* **2005**, *71* (12), 8241.
- 643 80. Braun, A.; Geier, M.; Bühler, B.; Schmid, A.; Mauersberger, S.; Glieder, A., Steroid biotransformations  
644 in biphasic systems with *Yarrowia lipolytica* expressing human liver cytochrome P450 genes. *Microbial Cell*  
645 *Factories* **2012**, *11* (1), 106.
- 646 81. Nthangeni, M. B.; Urban, P.; Pompon, D.; Smit, M. S.; Nicaud, J. M., The use of *Yarrowia lipolytica* for  
647 the expression of human cytochrome P450 CYP1A1. *Yeast* **2004**, *21* (7), 583-92.
- 648 82. Xu, P.; Gu, Q.; Wang, W.; Wong, L.; Bower, A. G. W.; Collins, C. H.; Koffas, M. A. G., Modular  
649 optimization of multi-gene pathways for fatty acids production in *E. coli*. *Nature Communications* **2013**, *4*,

- 650 1409.
- 651 83. Leonard, E.; Ajikumar, P.; Thayer, K.; Xiao, W.; Mo, J.; Tidor, B.; Stephanopoulos, G.; Prather, K.,  
652 Combining metabolic and protein engineering of a terpenoid biosynthetic pathway for overproduction and  
653 selectivity control. *Proc Natl Acad Sci U S A* **2010**, *107*, 13654-13659.
- 654 84. Zelcbuch, L.; Antonovsky, N.; Bar-Even, A.; Levin-Karp, A.; Barenholz, U.; Dayagi, M.;  
655 Liebermeister, W.; Flamholz, A.; Noor, E.; Amram, S.; Brandis, A.; Bareia, T.; Yofe, I.; Jubran, H.;  
656 Milo, R., Spanning high-dimensional expression space using ribosome-binding site combinatorics. *Nucleic  
657 Acids Research* **2013**, *41* (9), e98-e98.
- 658 85. He, L.; Xiu, Y.; Jones, J. A.; Baidoo, E. E. K.; Keasling, J. D.; Tang, Y. J.; Koffas, M. A. G.,  
659 Deciphering flux adjustments of engineered *E. coli* cells during fermentation with changing growth conditions.  
660 *Metabolic Engineering* **2017**, *39*, 247-256.
- 661 86. Munro, A. W.; Girvan, H. M.; Mason, A. E.; Dunford, A. J.; McLean, K. J., What makes a P450 tick?  
662 *Trends Biochem. Sci.* **2013**, *38* (3), 140-150.
- 663 87. Duncan, K.; Edwards, R. M.; Coggins, J. R., The pentafunctional arom enzyme of *Saccharomyces cerevisiae*  
664 is a mosaic of monofunctional domains. *Biochem J* **1987**, *246* (2), 375-386.
- 665 88. Dujon, B.; Sherman, D.; Fischer, G.; Durrens, P.; Casaregola, S.; Lafontaine, I.; De Montigny, J.;  
666 Marck, C.; Neuvéglise, C.; Talla, E.; Goffard, N.; Frangeul, L.; Aigle, M.; Anthouard, V.; Babour,  
667 A.; Barbe, V.; Barnay, S.; Blanchin, S.; Beckerich, J. M.; Beyne, E.; Bleykasten, C.; Boisrame, A.;  
668 Boyer, J.; Cattolico, L.; Confanioli, F.; De Daruvar, A.; Despons, L.; Fabre, E.; Fairhead, C.;  
669 Ferry-Dumazet, H.; Groppi, A.; Hantraye, F.; Hennequin, C.; Jauniaux, N.; Joyet, P.; Kachouri, R.;  
670 Kerrest, A.; Koszul, R.; Lemaire, M.; Lesur, I.; Ma, L.; Muller, H.; Nicaud, J. M.; Nikolski, M.;  
671 Oztas, S.; Ozier-Kalogeropoulos, O.; Pellenz, S.; Potier, S.; Richard, G. F.; Straub, M. L.; Suleau,  
672 A.; Swennen, D.; Tekaiia, F.; Wesolowski-Louvel, M.; Westhof, E.; Wirth, B.; Zeniou-Meyer, M.;  
673 Zivanovic, I.; Bolotin-Fukuhara, M.; Thierry, A.; Bouchier, C.; Caudron, B.; Scarpelli, C.;  
674 Gaillardin, C.; Weissenbach, J.; Wincker, P.; Souciet, J. L., Genome evolution in yeasts. *Nature* **2004**, *430*  
675 (6995), 35-44.
- 676 89. Xu, P.; Qiao, K. J.; Ahn, W. S.; Stephanopoulos, G., Engineering *Yarrowia lipolytica* as a platform for  
677 synthesis of drop-in transportation fuels and oleochemicals. *Proc. Natl. Acad. Sci. U. S. A.* **2016**, *113* (39),  
678 10848-10853.
- 679 90. Beopoulos, A.; Nicaud, J. M.; Gaillardin, C., An overview of lipid metabolism in yeasts and its impact on  
680 biotechnological processes. *Appl. Microbiol. Biotechnol.* **2011**, *90* (4), 1193-206.
- 681 91. Zhu, S.; Wu, J.; Du, G.; Zhou, J.; Chen, J., Efficient synthesis of eriodictyol from L-tyrosine in  
682 *Escherichia coli*. *Appl. Environ. Microbiol.* **2014**, *80* (10), 3072-3080.
- 683 92. Davis, M. S.; Solbiati, J.; Cronan, J. E., Jr., Overproduction of acetyl-CoA carboxylase activity increases the  
684 rate of fatty acid biosynthesis in *Escherichia coli*. *J Biol Chem* **2000**, *275* (37), 28593-8.
- 685 93. Hoja, U.; Wellein, C.; Greiner, E.; Schweizer, E., Pleiotropic phenotype of  
20



- 686 acetyl-CoA-carboxylase-defective yeast cells - Viability of a BPL1-amber mutation depending on its  
687 readthrough by normal tRNA<sup>GlnCAG</sup>. *Eur. J. Biochem.* **1998**, *254* (3), 520-6.
- 688 94. Chakravartty, V.; Cronan, J. E., Altered regulation of *Escherichia coli* biotin biosynthesis in BirA  
689 superrepressor mutant strains. *J. Bacteriol.* **2012**, *194* (5), 1113-1126.
- 690 95. Cronan, J. E.; Wallace, J. C., The gene encoding the biotin-apoprotein ligase of *Saccharomyces cerevisiae*.  
691 *Fems Microbiol Lett* **1995**, *130* (2-3), 221-229.
- 692 96. Braunwald, T.; Schwemmlin, L.; Graeff-Honninger, S.; French, W. T.; Hernandez, R.; Holmes, W. E.;  
693 Claupein, W., Effect of different C/N ratios on carotenoid and lipid production by *Rhodotorula glutinis*. *Appl.*  
694 *Microbiol. Biotechnol.* **2013**, *97* (14), 6581-8.
- 695 97. Ratledge, C.; Wynn, J. P., The biochemistry and molecular biology of lipid accumulation in oleaginous  
696 microorganisms. *Adv Appl Microbiol* **2002**, *51*.
- 697 98. Lv, Y.; Edwards, H.; Zhou, J.; Xu, P., Combining 26s rDNA and the Cre-loxP System for Iterative Gene  
698 Integration and Efficient Marker Curation in *Yarrowia lipolytica*. *ACS Synthetic Biology* **2019**, *8* (3), 568-576.
- 699 99. Xu, P.; Wang, W.; Li, L.; Bhan, N.; Zhang, F.; Koffas, M. A. G., Design and Kinetic Analysis of a  
700 Hybrid Promoter-Regulator System for Malonyl-CoA Sensing in *Escherichia coli*. *ACS Chemical Biology*  
701 **2014**, *9* (2), 451-458.

702

703

704 **Tables**

705

| <b>Table 1. Comparison of <i>E. coli</i>, <i>S. cerevisiae</i> and <i>Y. lipolytica</i> as chassis to produce plant natural products</b> |                |                      |                      |
|------------------------------------------------------------------------------------------------------------------------------------------|----------------|----------------------|----------------------|
| <b>Expression platform</b>                                                                                                               | <i>E. coli</i> | <i>S. cerevisiae</i> | <i>Y. lipolytica</i> |
| Genetic tools                                                                                                                            | +++++          | +++++                | +++                  |
| Genome annotation                                                                                                                        | +++++          | ++++                 | ++++                 |
| Acetyl-CoA/Malonyl-CoA/HMG-CoA flux                                                                                                      | ++             | +++                  | +++++                |
| P450 expression                                                                                                                          | +              | +++                  | +++++                |
| Substrate flexibility                                                                                                                    | ++++           | ++                   | ++++                 |
| Acid tolerance                                                                                                                           | +++            | ++                   | +++++                |
| FDA safety                                                                                                                               | +              | +++++                | +++++                |
| Hydrophobic lipid body environment                                                                                                       | +              | ++                   | +++++                |

706

707 **Figure and legends**

708

709

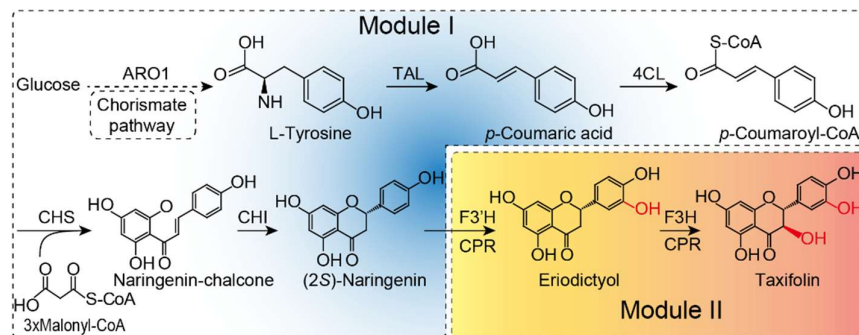

710

711 **Fig. 1.** Modular strategy to optimize naringenin, eriodictyol and taxifolin pathways. Based on  
712 the reaction cascades, flavonoid pathway was partitioned into 2 modules, naringenin synthetic  
713 module (Module I) and hydroxylation module (Module II). Module I contains chorismate  
714 pathway and malonyl-CoA utilizing step, and Module II contains flavanone 3-hydroxyase and  
715 cytochrome c P450 reductases.

716

717

718

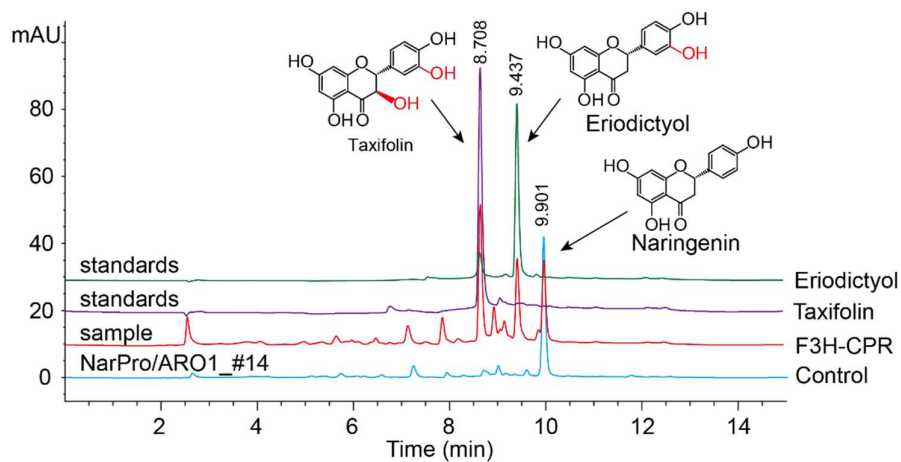

719

720 **Fig. 2.** HPLC profile of naringenin, eriodictyol and taxifolin. Two hydroxylated flavonoid  
721 standards (taxifolin, purple and eriodictyol, green) were injected to HPLC. One  
722 naringenin-producing sample (blue) and one taxifolin-producing sample (red) are shown in the  
723 chromatogram.

724

725

726

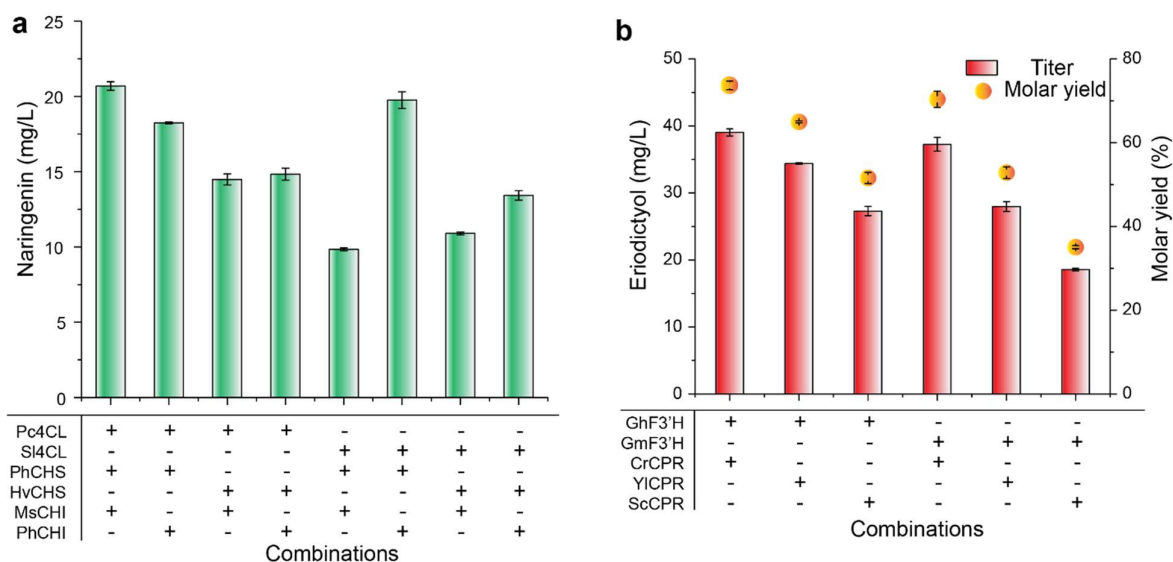

727

728 **Fig. 3.** Screening of gene combinations for improving flavonoid production. **(a)** Screening of  
 729 *4CH*, *CHS* and *CHI* genes from different plants for naringenin production. **(b)** Screening of *F3'H*  
 730 and *CPR* genes from different organisms for eriodictyol production. Plant name and gene  
 731 sources can be found in supplementary table S1.

732

733

734

735

736

737

738

739

740

741

742

743

744

745

746

747

748

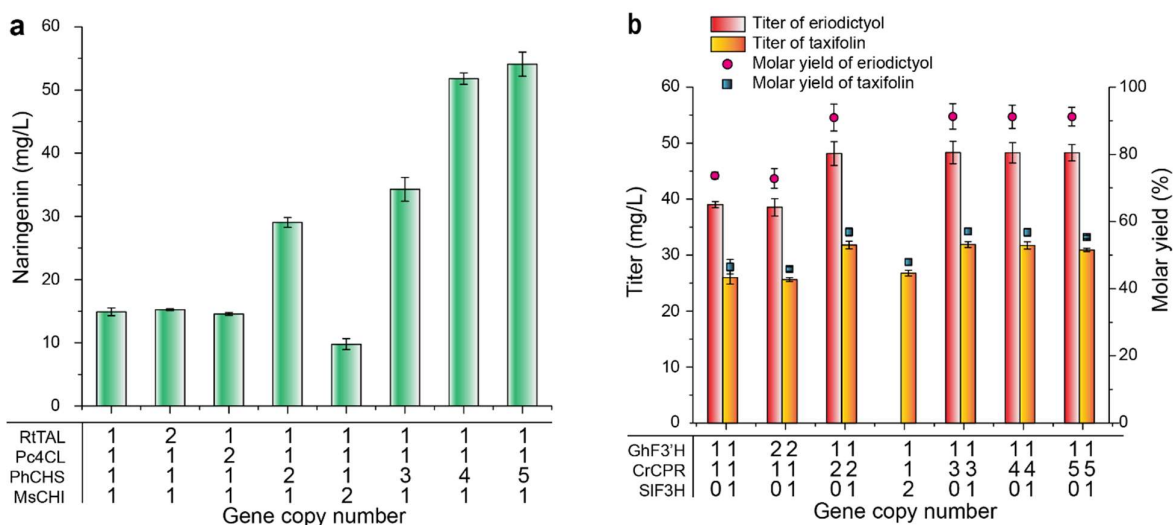

749

750 **Fig. 4.** Overcoming rate-limiting steps by tuning gene copy numbers. Rate-limiting steps were  
 751 determined by gradually increasing gene copy number of each step. Numbers refer to gene copy  
 752 numbers. **(a)** Rate-limiting step analysis and optimization of module I to improve naringenin  
 753 production. **(b)** Rate-limiting step analysis and optimization of module II to improve eriodictyol  
 754 and taxifolin production. The molar yield was calculated using 50 mg/L naringenin as feeding  
 755 substrate. The number 0 refers to the module that does not contain the respective gene.

756



757

758

759

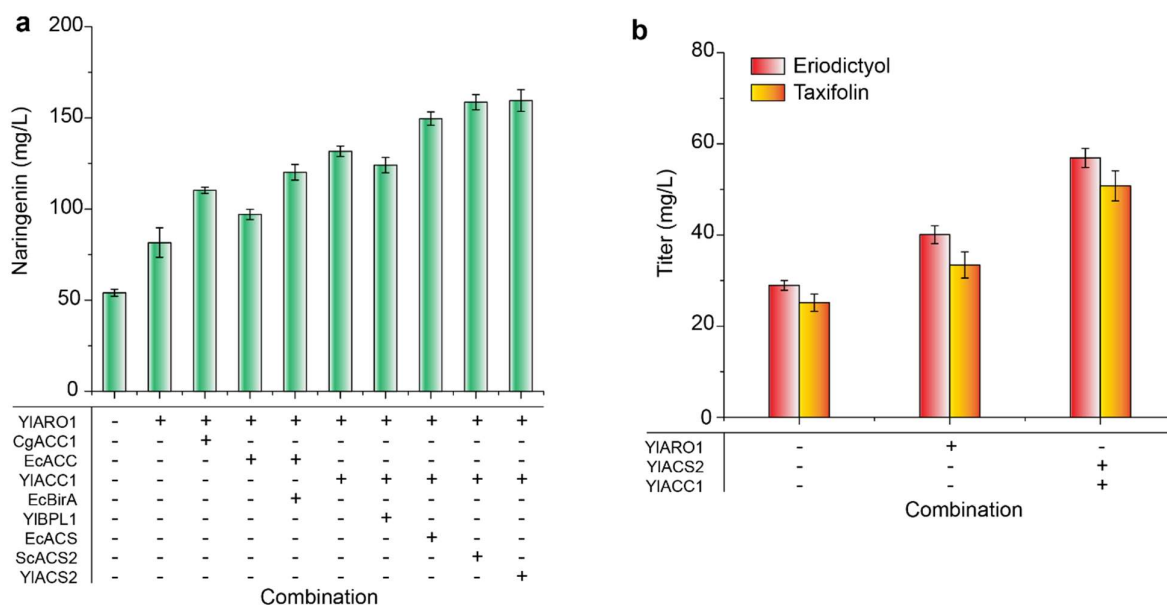

760

761 **Fig. 5.** Improving naringenin, eriodictyol, and taxifolin production by enhancing precursor  
 762 synthesis. **(a)** Identification of possible rate-limiting steps by overexpression of chorismate  
 763 pathway (ARO1), malonyl-CoA pathway (ACC) and acetyl-CoA pathway (ACS). The related  
 764 genes were overexpressed in strains Po1f/T4S<sub>x5</sub>I. **(b)** Effects of improving malonyl-CoA and  
 765 chorismate synthesis on eriodictyol and taxifolin production. For eriodictyol production, the  
 766 related genes were overexpressed in Po1f/T4S<sub>x5</sub>IHR<sub>x2</sub>. For taxifolin production, the related  
 767 genes were overexpressed in Po1f/T4S<sub>x5</sub>IHR<sub>x2</sub>H. + referred to the presence of gene  
 768 overexpression. – referred to the absence of gene overexpression.

769

770

771

772

773

774

775

776

777

778

779

780

781

782

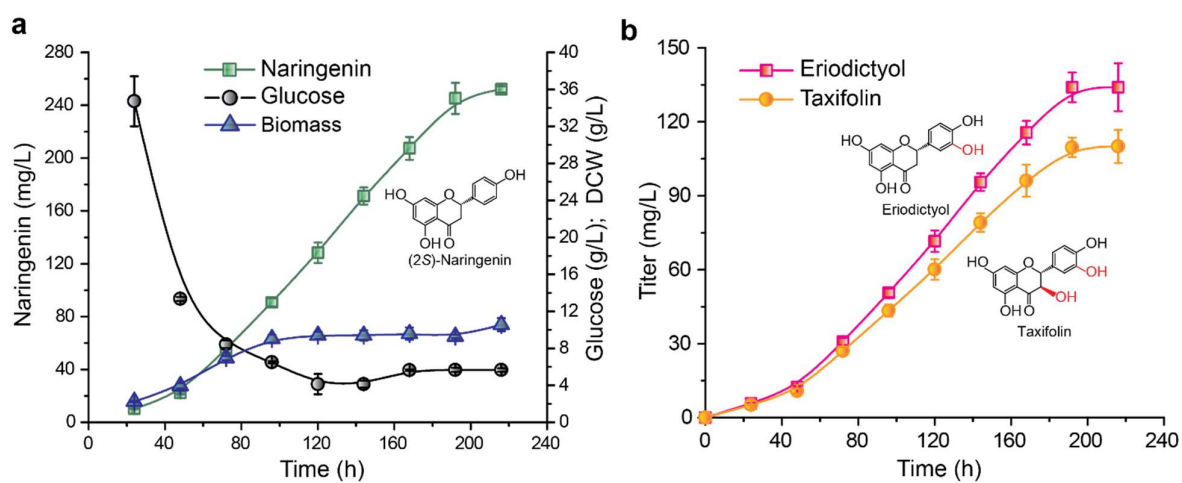

783

784 **Fig. 6.** Naringenin, eriodictyol and taxifolin production under the optimal conditions. (a).  
785 Naringenin production; (b) Eriodictyol and taxifolin production. The engineered strains were  
786 cultivated in fed-batch fermentation and buffered with 40 g/L CaCO<sub>3</sub>. A final concentration of 1  
787 mg/L cerulenin was supplemented at 48 h to inhibit fatty acid synthesis.

788
